# Supplementary material for: Real-time evaluation and adaptation to facilitate rapid recruitment in a large, prospective cohort study
Source: PubMed Central journal article supplement (PMC10938733; doi:10.1186/s12913-024-10750-5), 2024-03-13
Supplement: 12913_2024_10750_MOESM1_ESM.pdf [file 12913_2024_10750_MOESM1_ESM.pdf]

## Baseline Questionnaire

Page 1 of 19

### Demographics:

1. Have you ever been diagnosed with cancer?

a. Yes

• If yes, check all that apply:

None

Breast Cancer, Age at Diagnosis \_\_\_\_\_

Colon Cancer, Age at Diagnosis \_\_\_\_\_

Liver Cancer, Age at Diagnosis \_\_\_\_\_

Ovarian Cancer, Age at Diagnosis \_\_\_\_\_

Esophageal Cancer, Age at Diagnosis \_\_\_\_\_

Pancreatic Cancer, Age at Diagnosis \_\_\_\_\_

Stomach Cancer, Age at Diagnosis \_\_\_\_\_

Other, Specify Site \_\_\_\_\_ Age at  
Diagnosis \_\_\_\_\_

b. No

2. What is your current age? \_\_\_\_\_

3. What is your current height? \_\_\_\_\_ Feet \_\_\_\_\_ Inches

4. What is your current weight? \_\_\_\_\_ Pounds

5. Has your weight varied in the past 12 months?

Remained stable

Intentionally gone up more than 10 pounds

Unintentionally gone up more than 10 pounds

Intentionally gone down more than 10 pounds

Unintentionally gone down more than 10 pounds

6. Do you consider yourself Hispanic or Latino?

Yes

No

Don't know

Prefer not to answer

## Baseline Questionnaire

Page 2 of 19

7. What race or races do you consider yourself to be? (check all that apply)

- American Indian or Alaska Native
- Asian
- Black or African American
- Native Hawaiian or Pacific Islander
- White
- Other
- Don't know
- Prefer not to answer

8. Are you of Ashkenazi Jewish descent?

- Yes
  - If yes, please check the number of grandparents who were Ashkenazi Jewish
    - 1
    - 2
    - 3
    - 4 or more
- No
- Don't know
- Prefer not to answer

9. Which is the highest grade or level of education you have completed?

- 8th grade or less
- Some high school
- High school graduate or GED
- Vocational, technical or business school
- Some college or Associates Degree
- Four-year college graduate
- Graduate or professional school
- Other

## Baseline Questionnaire

Page 3 of 19

### Smoking History:

1. Have you smoked at least 100 cigarettes in your entire life?
  - Yes
  - No
    - If not, skip to Question #6
  - Don't know
  - Prefer not to answer
  
2. Do you currently smoke cigarettes every day, some days, or not at all?
  - Every day
  - Some days
  - Not at all
    - If no, skip to Question #4
  - Don't know
  - Prefer not to answer
  
3. At what age did you start smoking? \_\_\_\_\_
  
4. If you no longer smoke cigarettes regularly, at what age did you stop? \_\_\_\_\_
  
5. When you smoked, on average how many cigarettes did you/do you smoke per day?
  - Less than a half a pack (1-10)
  - Less than a pack (10-20)
  - A pack a day
  - 1-2 packs a day
  - More than 2 packs a day

Only answer the below questions if you answered "No" to Question #1.

6. Were you exposed to smoke from other people's cigarettes or tobacco products at home during childhood?
  - Yes
    - If yes, hours per day? \_\_\_\_\_
  - No

## Baseline Questionnaire

Page 4 of 19

- Don't know
- Prefer not to answer

7. Were you exposed to smoke from other people's cigarettes or tobacco products at home during adulthood

- Yes
  - If yes, hours per day? \_\_\_\_\_
- No
- Don't know
- Prefer not to answer

8. Were you exposed to smoke from other people's cigarettes or tobacco products at work during adulthood?

- Yes
  - If yes, hours per day? \_\_\_\_\_
- No
- Don't know
- Prefer not to answer

## Baseline Questionnaire

Page 5 of 19

### Alcohol History:

1. Have you ever consumed alcoholic beverages, such as beer, wine, or liquor at least once a week for 6 months or more?
  - Yes
  - No
  - Don't know
  - Prefer not to answer
  
2. How often did you have a drink containing alcohol in the past 12 months? (Consider a "drink" to be a can or bottle of beer, a glass of wine, or 1 cocktail or shot of hard Liquor such as scotch, gin, or vodka.)
  - None – Skip the remaining questions in this section
  - Once a month or less
  - 2 to 4 times a month
  - 2 to 3 times a week
  - 4 to 5 times a week
  - 6 or more times a day
  
3. How many drinks did you have on a typical day when you were drinking in the past 12 months?
  - 0 to 2 drinks
  - 3 to 4 drinks
  - 5 to 6 drinks
    - On more than one occasion?
      - Yes
      - No
  - 7 to 9 drinks
    - On more than one occasion?
      - Yes
      - No
  - 10 or more drinks
    - On more than on occasion
      - Yes
      - No

## Baseline Questionnaire

Page 6 of 19

4. Did you ever regularly (more than once a week for a year) drink 3 or more alcoholic beverages in a day?

Yes

- If yes, what age did you start drinking regularly? \_\_\_\_\_
- If yes and you stopped, what age did you stop drinking regularly? \_\_\_\_\_

No

5. What do you drink mainly?

Beer

Wine

Hard liquor

## Baseline Questionnaire

Page 7 of 19

### Menstrual History:

1. How old were you for your first menstrual period? \_\_\_\_\_
2. How old were you when you entered menopause? \_\_\_\_\_
3. Cause of Menopause:
  - Natural
  - Chemotherapy/medication induced
  - Surgery on reproductive organs
  - Other: \_\_\_\_\_
4. Between the ages of 18 and when you began menopause, have you ever experienced a time interval of 3 or more months when you did not have a menstrual period?
  - Yes, one time only
  - Yes, more than once
  - No (skip to Question #7)
  - Don't know (skip to Question #7)
5. If yes to Question #4, were you breastfeeding at the time?
  - Yes
  - No
  - Don't know
6. If yes to Question #5, were you breastfeeding or pregnant every time this happened
  - Yes
  - No
  - Don't know

## Baseline Questionnaire

Page 8 of 19

7. During ages 18-22 what was the pattern of your menstrual cycles? (excluding time around pregnancies)
- Regular
  - Usually irregular
  - Always irregular
  - No periods
8. Have you undergone mastectomy?
- Yes, one breast at age \_\_\_\_, Reason \_\_\_\_\_
  - Yes, both breasts at age \_\_\_\_, Reason \_\_\_\_\_
  - No
9. Have you undergone oophorectomy (removal of one or both ovaries)?
- Yes, Unilateral at age \_\_\_\_, Reason \_\_\_\_\_
  - Yes, Bilateral at age \_\_\_\_, Reason \_\_\_\_\_
  - No
10. Have you undergone a hysterectomy (removal of the uterus)?
- Yes, at age \_\_\_\_, Reason \_\_\_\_\_
  - No
11. Have you ever been pregnant?
- Yes
  - No (skip to Question #16)
12. How many pregnancies have you had? \_\_\_\_\_



**Baseline Questionnaire**

13. What was the outcome of your pregnancy?

|            | Pregnancy: |   |   |   |   |   |   |   |   |    |    |    |    |    |    |
|------------|------------|---|---|---|---|---|---|---|---|----|----|----|----|----|----|
| Outcome    | 1          | 2 | 3 | 4 | 5 | 6 | 7 | 8 | 9 | 10 | 11 | 12 | 13 | 14 | 15 |
| Live Birth |            |   |   |   |   |   |   |   |   |    |    |    |    |    |    |
| Still Born |            |   |   |   |   |   |   |   |   |    |    |    |    |    |    |
| Other      |            |   |   |   |   |   |   |   |   |    |    |    |    |    |    |

Other, please describe: \_\_\_\_\_

14. If live birth, did you breast feed?

Yes

• If yes, how many months for each child?

\_\_\_\_\_

\_\_\_\_\_

\_\_\_\_\_

\_\_\_\_\_

No

15. How old were you for your first birth? \_\_\_\_\_

16. Have you ever taken hormone replacement therapy other than birth control pills (e.g. estrogen, estrogen/progesterone combination)?

Yes

• If yes, how old were you when you first began taking any hormone therapy? \_\_\_\_\_

No (skip the remaining questions in this section)

17. What type of therapy are you taking now or most recently took?

Estrogen only

Estrogen and progesterone (Provera or Prempro)

Don't know

## Baseline Questionnaire

Page 10 of 19

18. Are you still taking hormone therapy?

Yes

No

- If no, how old were you when you stopped taking any hormone therapy? \_\_\_\_\_

19. Check all that apply, have you ever taken?

Tamoxifen

Raloxifene

None

Don't know

## Baseline Questionnaire

Page 11 of 19

### Cancer History:

1. Is your mother alive or deceased?

Alive

• What is her current age? \_\_\_\_\_

Deceased

• What was her age at death? \_\_\_\_\_

2. Did your mother ever have cancer?

Yes

• If yes, type of first cancer? \_\_\_\_\_

No

Don't know

3. Is your father alive or deceased?

Alive

• What is his current age? \_\_\_\_\_

Deceased

• What was his age at death? \_\_\_\_\_

4. Did your father ever have cancer?

Yes

• If yes, type of first cancer? \_\_\_\_\_

No

Don't know

5. How many brothers do you have? \_\_\_\_\_

6. How many sisters do you have? \_\_\_\_\_

## Baseline Questionnaire

Page 12 of 19

7. Complete the following questions for **each sibling** (skip to the next question, if you do not have siblings):

- What is the current age, or if deceased their age at death?

---

---

---

---

- Did your (sister/brother) ever have cancer?

Yes

- If yes, type of first cancer (for each sibling)?

---

---

---

---

- If yes, age at first cancer (for each sibling)?

---

---

---

---

No

Don't know

8. How many daughters do you have? \_\_\_\_\_

9. How many sons do you have? \_\_\_\_\_

## Baseline Questionnaire

Page 13 of 19

**10.** Complete the following questions for **each child** (skip to the next question, if you do not have children):

- What is the current age, or if deceased their age at death?

---

---

---

- Did your (daughter/son) ever have cancer?

- Yes

- If yes, type of first cancer (for each child)?

---

---

---

- If yes, age of first cancer (for each child)?

---

---

---

- No

- Don't know

**11.** Have any of your close family members (parents, siblings, children) been diagnosed with or had a positive genetic test for the following hereditary cancer syndromes?

- None
- Lynch Syndrome (including MLH1, MSH2, MSH6 & PMS2 genes)
- Hereditary Breast/Ovarian Cancer syndrome (including BRCA1/2 genes)
- Cowden syndrome (PTEN gene)
- Familial adenomatous polyposis (APC gene)
- MUTYH-associated polyposis (MUTYH gene)
- Li-Fraumeni syndrome (TP53 gene)
- Hereditary melanoma (CDKN2A gene)
- Hereditary diffuse gastric cancer (CDH1 gene)
- Peutz-Jeghers syndrome (STK11 gene)
- Other hereditary cancer syndrome or positive genetic test for hereditary cancer (specify) \_\_\_\_\_

## Baseline Questionnaire

Page 14 of 19

### **Medications:**

Please check any medications that you ever used on a regular basis (i.e., at least once per week)

| <b><u>Check if YES</u></b> |                                                                     | <b><u>Less than 1 year</u></b> | <b><u>1 to 3 years</u></b> | <b><u>3 to 5 years</u></b> | <b><u>6 to 10 years</u></b> | <b><u>11 years or more</u></b> |
|----------------------------|---------------------------------------------------------------------|--------------------------------|----------------------------|----------------------------|-----------------------------|--------------------------------|
|                            | Advil, Aleve, Motrin or other non-steroidal anti-inflammatory drugs |                                |                            |                            |                             |                                |
|                            | Celebrex, Vioxx or Bextra                                           |                                |                            |                            |                             |                                |
|                            | Aspirin – full dose or extra strength                               |                                |                            |                            |                             |                                |
|                            | Aspirin – low dose or baby aspirin                                  |                                |                            |                            |                             |                                |
|                            | Tylenol                                                             |                                |                            |                            |                             |                                |
|                            | Other drug for pain relief                                          |                                |                            |                            |                             |                                |

## Baseline Questionnaire

Page 15 of 19

**Other Medical Conditions:** Please check any conditions that you have ever been diagnosed with.

| Have you ever been diagnosed with any of the following? | Yes | Year diagnosed? |                                                                                                        |
|---------------------------------------------------------|-----|-----------------|--------------------------------------------------------------------------------------------------------|
| Fibrocystic/ other benign breast disease                |     |                 | Confirmed by breast biopsy?<br>[ ] yes<br>[ ] no                                                       |
|                                                         |     |                 | Confirmed by aspiration?<br>[ ] yes<br>[ ] no                                                          |
| Ductal Carcinoma in Situ                                |     |                 |                                                                                                        |
| Non-cancerous colon or rectal polyp (adenoma)           |     |                 |                                                                                                        |
| Ulcerative colitis/Crohn's disease                      |     |                 |                                                                                                        |
| Gastric ulcer                                           |     |                 |                                                                                                        |
| Barrett's esophagus                                     |     |                 |                                                                                                        |
| Diabetes                                                |     |                 | Are you taking medicine for this?<br>[ ] yes<br>[ ] no<br>[ ] don't know                               |
|                                                         |     |                 | If you are taking medicine, is it:<br>[ ] insulin<br>[ ] pills                                         |
|                                                         |     |                 | If you are taking medicine, at what age was this first treated?                                        |
|                                                         |     |                 | If you are taking insulin, was it your first diabetes medicine?<br>[ ] yes<br>[ ] no<br>[ ] don't know |
|                                                         |     |                 | Did diabetes occur ONLY during pregnancy?<br>[ ] yes<br>[ ] no<br>[ ] don't know                       |
|                                                         |     |                 |                                                                                                        |
| Endometriosis- 1 <sup>st</sup> diagnosis                |     |                 | Confirmed by laparoscopy?<br>[ ] yes<br>[ ] no                                                         |
| Uterine fibroids- 1 <sup>st</sup> diagnosis             |     |                 | Confirmed by pelvic exam?<br>[ ] yes<br>[ ] no                                                         |
|                                                         |     |                 | Confirmed by ultrasound/hysterectomy?<br>[ ] yes<br>[ ] no                                             |

## Baseline Questionnaire

Page 16 of 19

| Have you ever been diagnosed with any of the following? | Yes | Year diagnosed? |                                                                                           |
|---------------------------------------------------------|-----|-----------------|-------------------------------------------------------------------------------------------|
| Multiple sclerosis                                      |     |                 |                                                                                           |
| Emphysema/chronic bronchitis, doctor diagnosed          |     |                 |                                                                                           |
| Grave's disease/hyperthyroidism                         |     |                 |                                                                                           |
| Thyroid nodule (benign)                                 |     |                 |                                                                                           |
| Gout                                                    |     |                 |                                                                                           |
| SLE (systemic lupus)                                    |     |                 |                                                                                           |
| Rheumatoid arthritis, doctor diagnosed                  |     |                 |                                                                                           |
| H. Pylori                                               |     |                 |                                                                                           |
| Hepatitis A                                             |     |                 |                                                                                           |
| Hepatitis B                                             |     |                 |                                                                                           |
| Hepatitis C                                             |     |                 |                                                                                           |
| Jaundice (yellowing of skin or eye)                     |     |                 |                                                                                           |
| Cirrhosis                                               |     |                 |                                                                                           |
| Alcoholic liver disease                                 |     |                 |                                                                                           |
| Non-alcoholic fatty liver disease                       |     |                 |                                                                                           |
| HIV (AIDS)                                              |     |                 |                                                                                           |
| Pancreatitis                                            |     |                 | Was this related to a procedure (ERCP or EUS)?<br><br>Did you have more than one episode? |
| Other major illness or surgery                          |     |                 | Please specify:                                                                           |



## Baseline Questionnaire

Page 17 of 19

1. During the past three years, have you had a chest x-ray?
  - Yes, once
  - Yes, more than once
  - No (skip to Question #3)
  - Don't know (skip to Question #3)
  
2. If yes, what was the outcome of the test?
  - Normal
  - Other, please explain: \_\_\_\_\_
  
3. During the past three years, have you had a test for blood in the stool?
  - Yes, once
  - Yes, more than once
  - No
  - Don't know
  
4. During the past three years, have you had a colonoscopy, sigmoidoscopy, virtual (CT) colonoscopy or barium enema to examine the colon and rectum?
  - Yes, once
  - Yes, more than once
  - Don't know
  - No
  
5. During the past three years, have you had an upper endoscopy to examine the esophagus, or stomach?
  - Yes, once
  - Yes, more than once
  - No
  - Don't know

## Baseline Questionnaire

Page 18 of 19

6. During the past three years, have you had a mammogram?
- Yes, once
  - Yes, more than once
  - No
  - Don't know
7. During the past three years, have you had a MRI of the breast?
- Yes, once
  - Yes, more than once
  - No
  - Don't know
8. During the past three years, have you had a Pap smear?
- Yes, once
  - Yes, more than once
  - No
  - Don't know
9. During the past three years, have you had a pelvic examination?
- Yes, once
  - Yes, more than once
  - No
  - Don't know
10. During the past three years, have you had an ultrasound or scan of your ovaries?
- Yes, once
  - Yes, more than once
  - No
  - Don't know

## Baseline Questionnaire

Page 19 of 19

11. During the past three years, have you had a blood test for ovarian cancer (for example, CA-125)?

- Yes, once
- Yes, more than once
- No
- Don't know

12. During the past three years, have you had your pancreas screened?

- Yes, via Computed Tomography (CT, CAT)
- Yes, via Magnetic Resonance Imaging (MRI)
- Yes, via Endoscopic Ultrasound (EUS)
- Yes, via other screening method
- No (skip to Question #14)

13. What was the outcome of the test?

- Normal
- Other, please explain: \_\_\_\_\_

14. During the past three years, have you a Computed Tomography (CT, CAT)?

- Yes
- No (skip to Question #17)

15. Please indicate the reason for the CT/CAT scan: \_\_\_\_\_

16. Please indicate the results of the CT/CAT scan: \_\_\_\_\_

17. During the past three years, have you an MRI?

- Yes
- No (skip the remaining questions in this section)

18. Please indicate the reason for the MRI: \_\_\_\_\_

19. Please indicate the results of the MRI: \_\_\_\_\_
